# Supplementary material for: Loss of mGluR5 in D1 Receptor-Expressing Neurons Improves Stress Coping
Source: MDPI journal article supplement (doi:10.3390/ijms22157826), 2021-07-22
Supplement: s1 [file s1]

## Supplementary Data

### Supplementary Figures

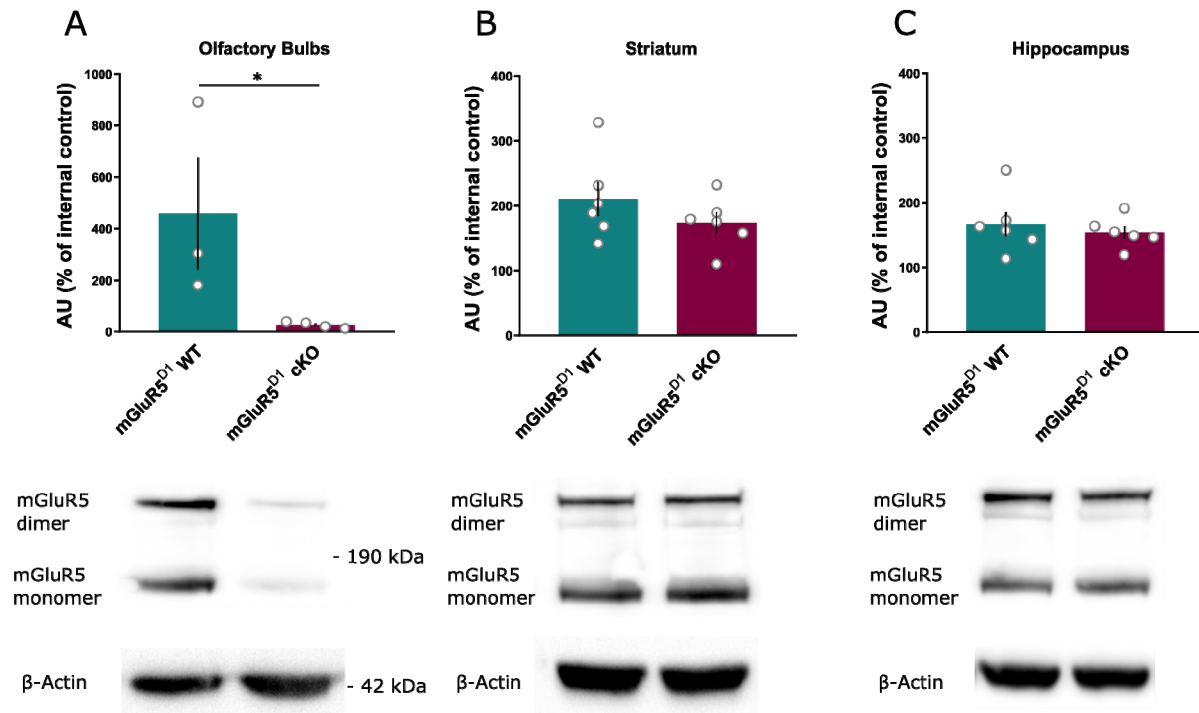

**Figure S1.** Relative mGluR5 protein level (arbitrary units, % of internal control) in WT and cKO mice (upper panels), with representative blot examples shown (lower panels), **(A)** in the olfactory bulb (Mann-Whitney;  $U = 0$ ;  $p = 0.028$ ;  $n = 3$  mGluR5 WT,  $n = 4$  mGluR5 cKO), **(B)** striatum (Mann-Whitney;  $U = 13$ ;  $p = 0.24$ ,  $n = 6$  mGluR5 WT,  $n = 6$  mGluR5 cKO) and **(C)** hippocampus (Mann-Whitney;  $U = 16$ ;  $p = 0.4$ ,  $n = 6$  mGluR5 WT,  $n = 6$  mGluR5 cKO). Data are presented as individual values, mean  $\pm$  SEM.

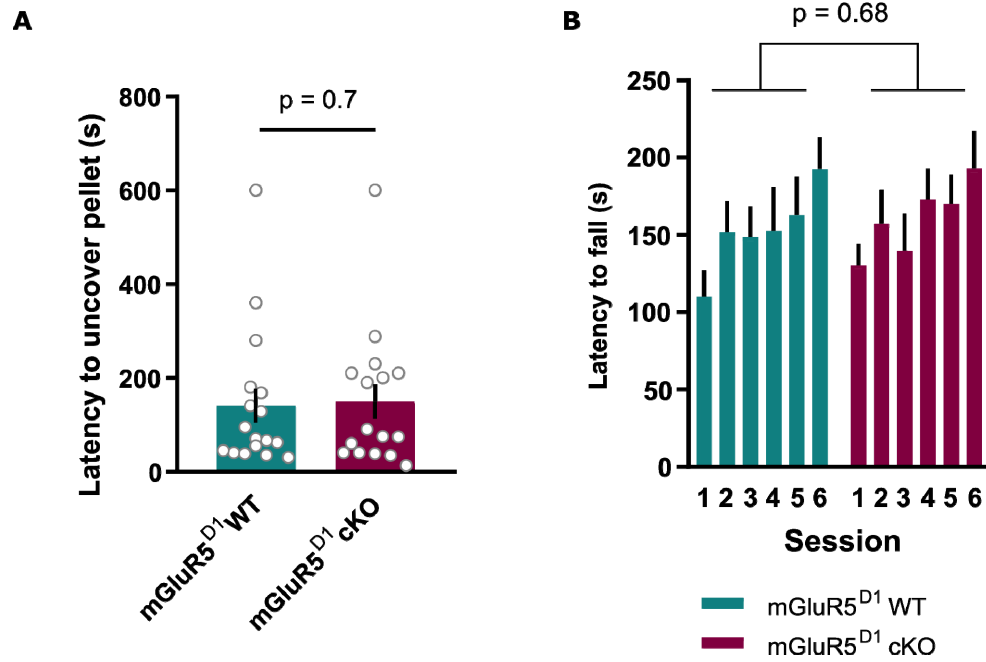

**Figure S2.** (A) The latency to uncover a food pellet (s) during a 10 min test was similar between mGluR5<sup>D1</sup> WT (n=17) and cKO (n=16) mice (Mann-Whitney; U=127; p=0.75). Data are presented as individual values, mean  $\pm$  SEM. (B) The latency to fall from an accelerating rotarod across six sessions was similar between mGluR5<sup>D1</sup> WT (n=10) and cKO (n=10) mice: Two-way ANOVA, main effect genotype:  $F(1,18) = 0.176$ , ns ( $p = 0.68$ ); main effect session:  $F(5,90) = 3.12$ ,  $p = 0.012$ ; interaction effect:  $F(5, 90) = 0.174$ , ns ( $p = 0.97$ ). Data are presented as mean  $\pm$  SEM.
